# Supplementary material for: ATP Consumption Is Coupled with Endocytosis in Exudated Neutrophils
Source: MDPI journal article supplement (doi:10.3390/ijms24109039), 2023-05-20
Supplement: s1 [file s1]

## Supplement Figure S1

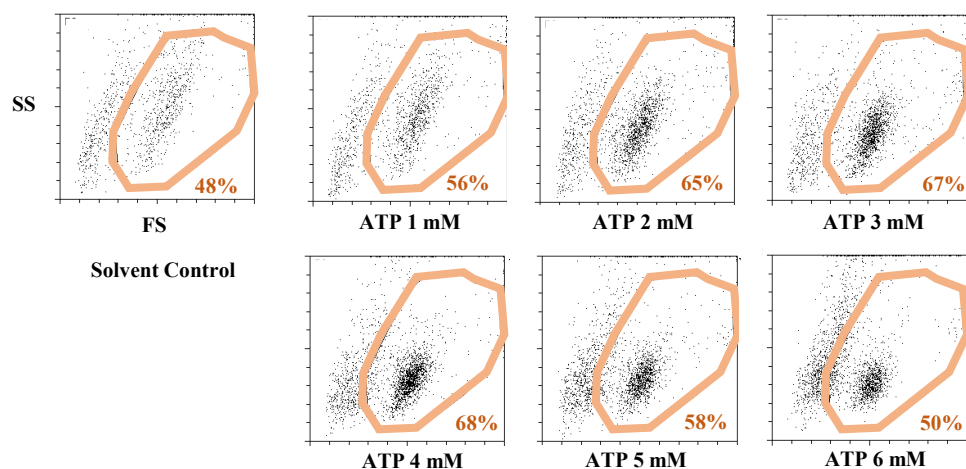

Neutrophils were treated with indicated concentration of ATP for 1 h then cultured with PM (20  $\mu\text{g}/\text{ml}$ ) for 3 h. Then stained with an anti-CD11b antibody and analyzed by flow cytometry. CD11b positive cells were shown and plotted by side scatter (SS) and forward scatter (FS). Percentage showed CD11b positive intact neutrophils.

**Supplement Figure S2**

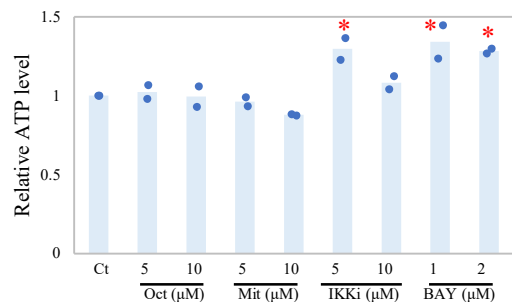

Neutrophils were treated with indicated concentration of inhibitors for 2 h. Relative ATP level was evaluated (n = 2). Results were shown as dots, mean relative level (indicated by columns for each group). Solvent control treatment group was set as the reference group (1.0). \*p < 0.05 vs. Ct.

### Supplement Figure S3

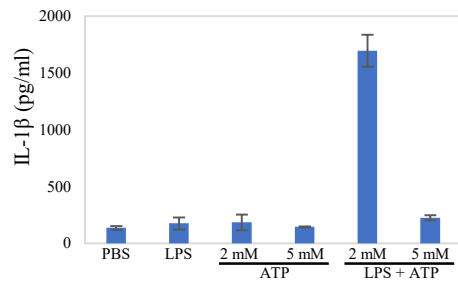

IL-1 $\beta$  production was low when treated with high concentration of ATP. Neutrophils were incubated with LPS (1  $\mu$ g/ml) for 3 h in the presence or absent of ATP (2 mM or 5 mM). ATP was added last 0.5 h before harvest. IL-1 $\beta$  in cell culture supernatant were measured by enzyme-linked immunosorbent assays (ELISA).
